# Supplementary material
Source: PubMed Central journal article supplement (PMC5860844)

## SUPPLEMENTARY DATA

**Supplementary Figure 1.** Flow diagram of study participants, including information on timing of CTGF measurement and follow-up time post-CTGF measurement.

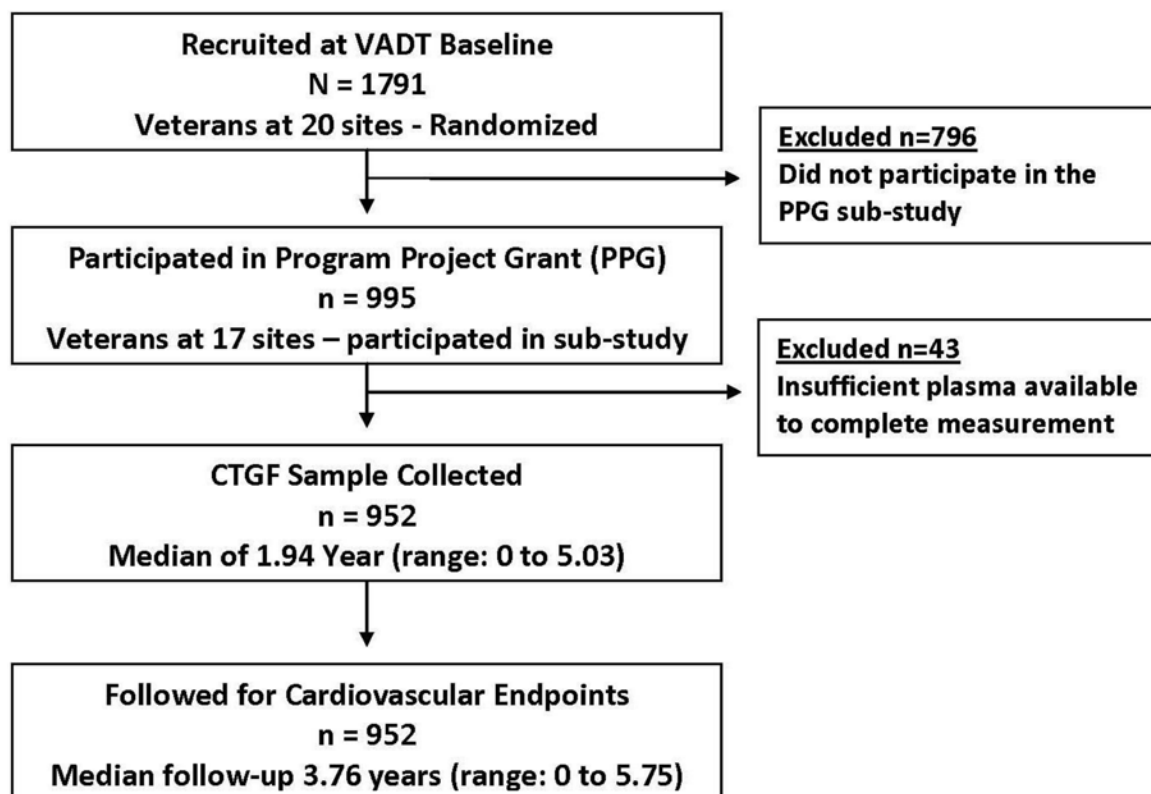

Supplement: DC172083SupplementaryData.pdf [file DC172083SupplementaryData.pdf]
